# Supplementary material for: The Drosophila SWI/SNF chromatin-remodeling complexes BAP and PBAP play separate roles in regulating growth and cell fate during regeneration
Source: bioRxiv or medRxiv preprint supplement (doi:10.1101/326439), 2020-05-02
Supplement: Supplementary file [file 326439-1.pdf]

# Supplemental Figure 1

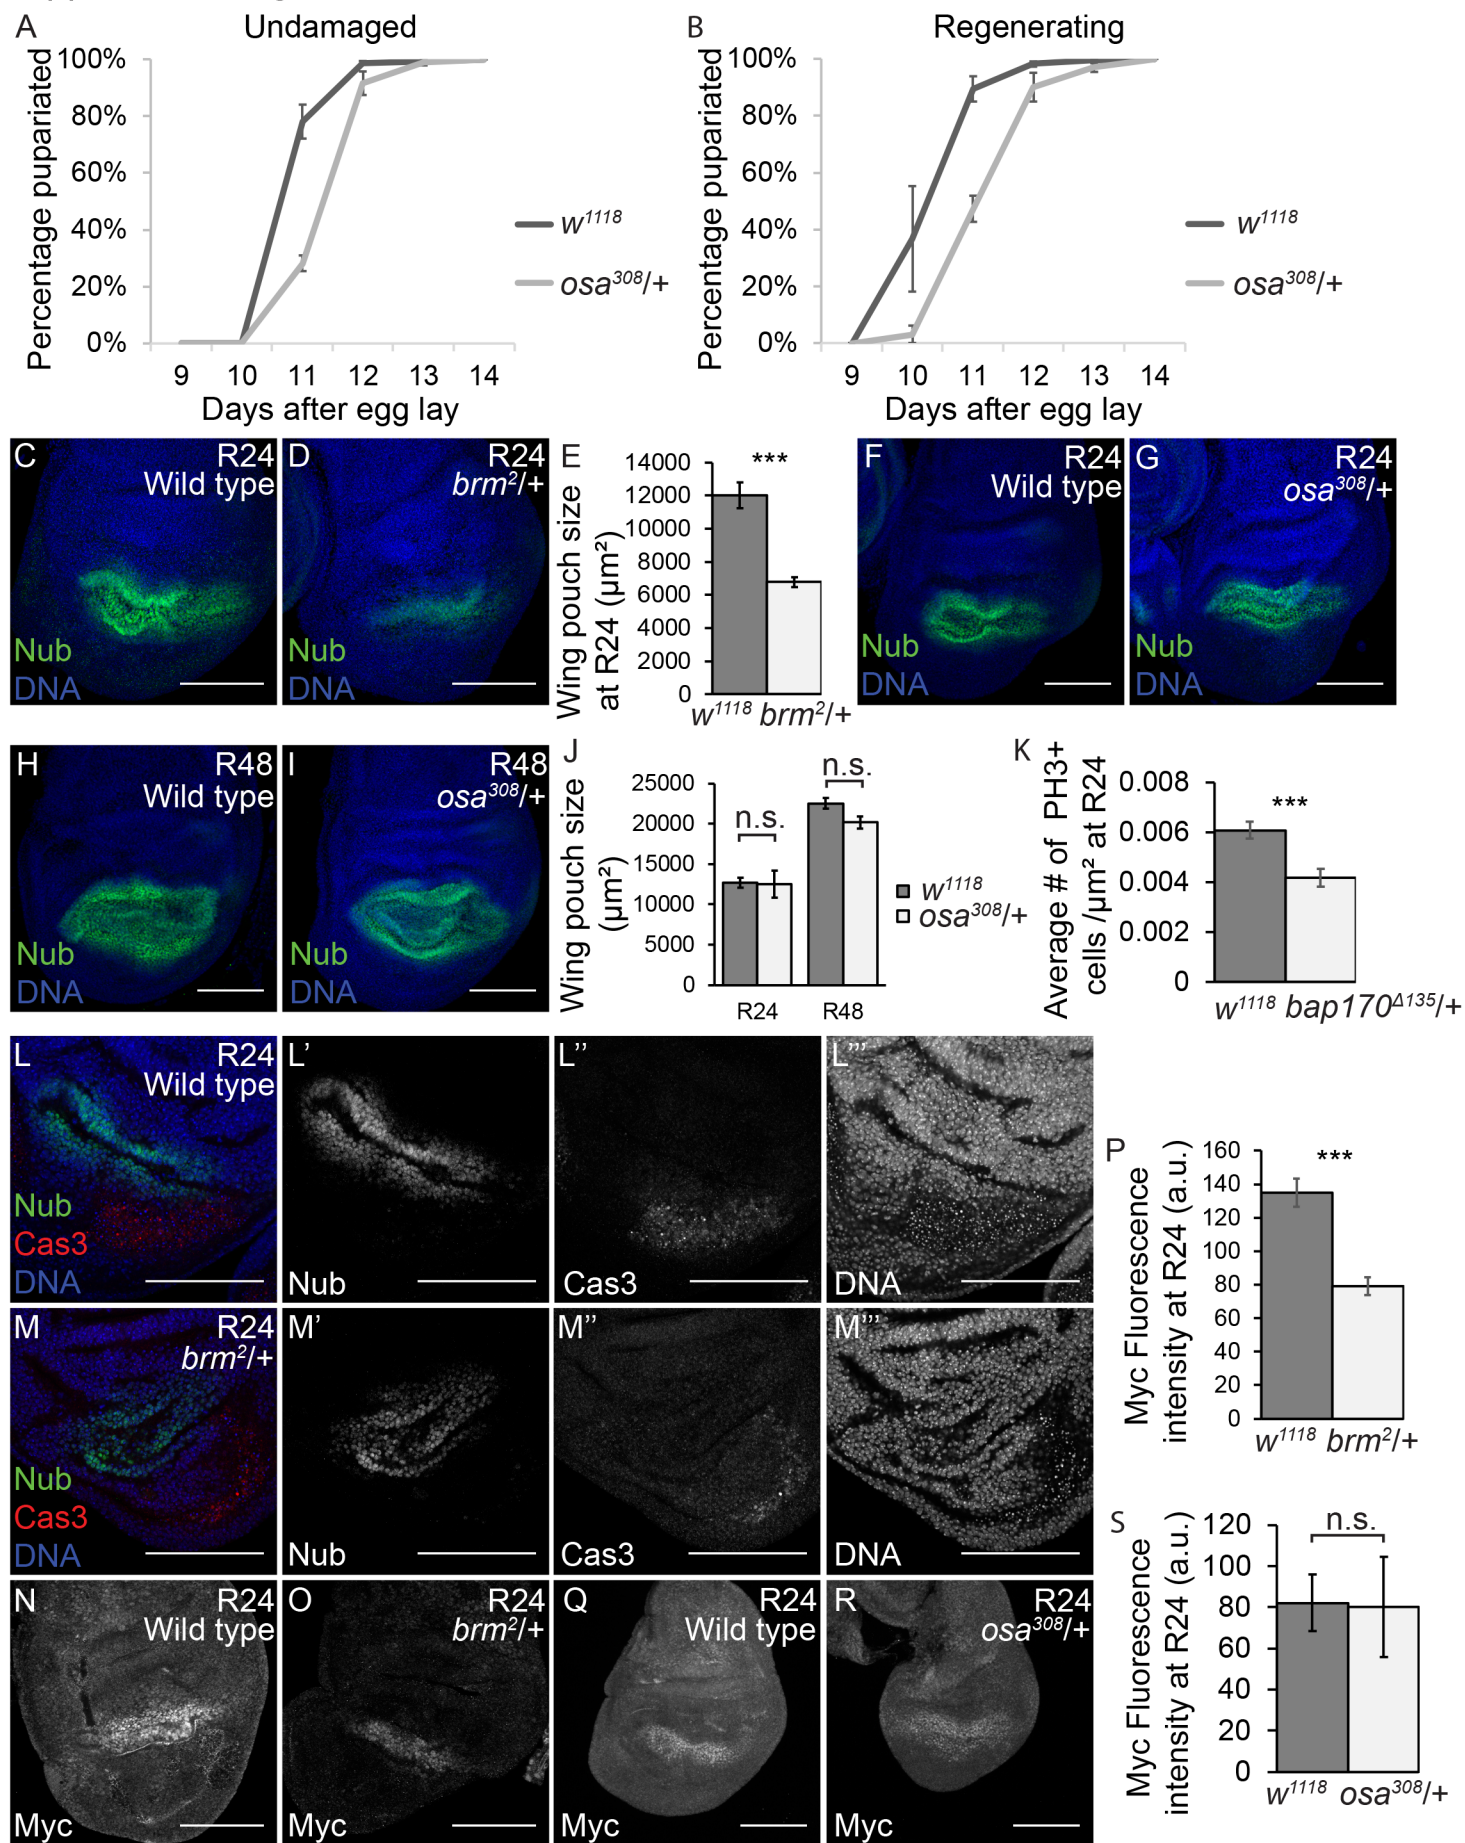

**S1 Fig. The PBAP complex is required for regenerative growth whereas the BAP complex is not.**

(A) Pupariation rates of animals during normal development at 18°C. n = 79 pupae (*osa*<sup>308/+</sup>) and 173 pupae (*w*<sup>1118</sup>) from 3 independent experiments.

(B) Pupariation rates of animals after tissue damage (30°C) and regeneration (18°C). n = 101 pupae (*osa*<sup>308/+</sup>) and 155 pupae (*w*<sup>1118</sup>) from 3 independent experiments. Because the temperature shift to 30°C in the ablation protocol increases the developmental rate, the pupariation timing of regenerating animals (B) cannot be compared to the undamaged control animals (A).

(C) Wild-type (*w*<sup>1118</sup>) regenerating wing disc at R24 with wing pouch marked by anti-Nubbin (green) immunostaining. DNA (blue) was detected with Topro3.

(D) *brm*<sup>2/+</sup> regenerating wing disc at R24 with wing pouch marked by anti-Nubbin (green) immunostaining. DNA (blue) was detected with Topro3.

(E) Comparison of regenerating wing pouch size at 24 hours after imaginal disc damage in *brm*<sup>2/+</sup> and wild-type (*w*<sup>1118</sup>) animals. n = 11 wing discs (*brm*<sup>2/+</sup>) and 10 wing discs (*w*<sup>1118</sup>).

(F) Wild-type (*w*<sup>1118</sup>) regenerating wing disc at R24 with wing pouch marked by anti-Nubbin (green) immunostaining. DNA (blue) was detected with Topro3.

(G) *osa*<sup>308/+</sup> regenerating wing disc at R24 with wing pouch marked by anti-Nubbin (green) immunostaining. DNA (blue) was detected with Topro3.

(H) Wild-type ( $w^{1118}$ ) regenerating wing disc at R48 with wing pouch marked by anti-Nubbin (green) immunostaining. DNA (blue) was detected with Topro3.

(I)  $osa^{308/+}$  regenerating wing disc at R48 with wing pouch marked by anti-Nubbin (green) immunostaining. DNA (blue) was detected with Topro3.

(J) Comparison of regenerating wing pouch size at 24 and 48 hours after imaginal disc damage and regeneration in  $osa^{308/+}$  and wild-type ( $w^{1118}$ ) animals. At R24,  $n = 8$  wing discs ( $osa^{308/+}$ ) and 10 wing discs ( $w^{1118}$ ). At R48,  $n = 6$  wing discs ( $osa^{308/+}$ ) and 8 wing discs ( $w^{1118}$ ).

(K) Average number of mitotic cells (marked with PH3 immunostaining) per  $\mu\text{m}^2$  in the regenerating wing primordium at R24 in  $bap170^{\Delta 135/+}$  and wild-type ( $w^{1118}$ ) animals.  $n = 8$  wing discs ( $bap170^{\Delta 135/+}$ ) and 10 wing discs ( $w^{1118}$ ).

(L) Wild-type ( $w^{1118}$ ) regenerating wing disc at R24 with Nubbin (green) (L') and cleaved Caspase 3 (red)(L'') immunostaining. DNA (blue)(L''') was detected with Topro3.

(M)  $brm^2/+$  regenerating wing disc at R24 with Nubbin (green)(M') and cleaved Caspase 3 (red)(M'') immunostaining. DNA (blue)(M''') was detected with Topro3.

(N-O) Wild-type ( $w^{1118}$ ) (N) and  $brm^2/+$  (O) regenerating wing discs at R24 with Myc immunostaining.

(P) Quantification of anti-Myc immunostaining fluorescence intensity in the wing pouch in  $brm^2/+$  and wild-type ( $w^{1118}$ ) regenerating wing discs at R24.  $n = 11$  wing

discs (*brm*<sup>2/+</sup>) and 12 wing discs (*w*<sup>1118</sup>).

(Q-R) Wild-type (*w*<sup>1118</sup>) (Q) and *osa*<sup>308/+</sup> (R) regenerating wing discs at R24 with Myc immunostaining.

(S) Quantification of anti-Myc immunostaining fluorescence intensity in the wing pouch in *osa*<sup>308/+</sup> and wild-type (*w*<sup>1118</sup>) regenerating wing discs at R24. n = 6 wing discs (*osa*<sup>308/+</sup>) and 8 wing discs (*w*<sup>1118</sup>).

Error bars are SEM. Scale bars are 100µm for all wing discs images. \*\*\* p < 0.01, Student's *t*-test.

Supplemental Figure 2

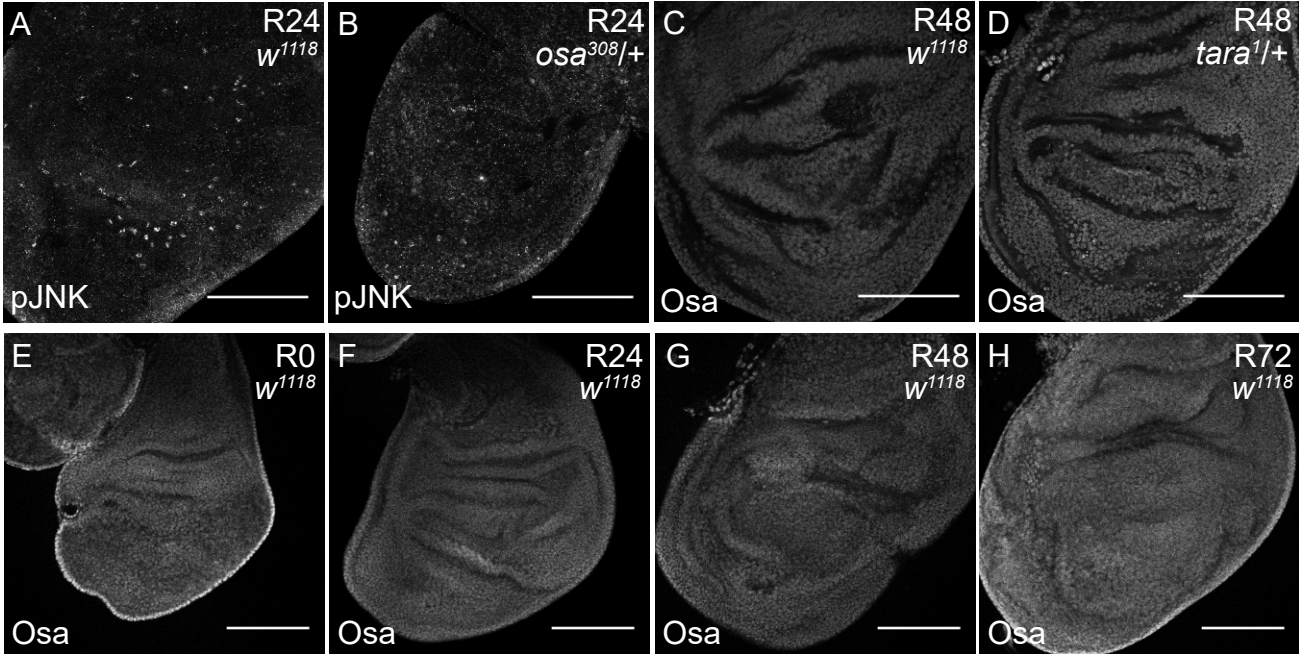

**S2 Fig. The function of BAP in preventing P-to-A transformation.**

(A-B) Wild-type ( $w^{1118}$ ) (A) and  $osa^{308/+}$  (B) regenerating wing discs at R24 with phospho-JNK immunostaining.

(C-D) Wild-type ( $w^{1118}$ ) (C) and  $tara^1/+$  (D) regenerating wing discs at R48 with Osa immunostaining.

(E-H) Wild-type ( $w^{1118}$ ) regenerating wing discs at 0, 24, 48, and 72 hours after imaginal disc damage and regeneration with Osa immunostaining.

Scale bars are 100 $\mu$ m for all wing discs images.
