# Supplementary material for: The Drosophila SWI/SNF chromatin-remodeling complexes BAP and PBAP play separate roles in regulating growth and cell fate during regeneration
Source: bioRxiv or medRxiv preprint supplement (doi:10.1101/326439), 2020-05-02
Supplement: Supplementary file [file 326439-1.pdf]

S1 Table. Screen of chromatin regulators

| PcG & TrxG                |                       |                                                 |                |
|---------------------------|-----------------------|-------------------------------------------------|----------------|
| Gene                      | Complex               | Genotype                                        | $\Delta$ Index |
| <i>Pc</i>                 | PRC1                  | <i>Pc</i> <sup>3</sup>                          | 7%             |
| <i>Psc</i>                | PRC1                  | <i>Psc</i> <sup>1</sup>                         | 9%             |
|                           |                       | <i>Psc</i> <sup>e24</sup>                       | -20%           |
| <i>Sce</i>                | PRC1                  | <i>Sce</i> <sup>1</sup>                         | 18%            |
| <i>Scm</i>                | PRC1                  | <i>Scm</i> <sup>D1</sup>                        | 46%            |
| <i>E(z)</i>               | PRC2                  | <i>E(z)</i> <sup>731</sup>                      | -14%           |
| <i>Su(z)12</i>            | PRC2                  | <i>Su(z)12</i> <sup>2</sup>                     | -9%            |
| <i>esc</i>                | PRC2                  | <i>esc</i> <sup>21</sup>                        | 26%            |
| <i>Caf1-55</i>            | PRC2, NURF            | <i>Caf1-55</i> <sup>DG25308</sup>               | -19%           |
| <i>escl</i>               | PRC2                  | <i>escl</i> <sup>d01514</sup>                   | -20%           |
| <i>phoI</i>               | PhoRC                 | <i>pho</i> <sup><math>\beta</math>1A</sup>      | 41%            |
| <i>ash2</i>               | COMPASS, COMPASS-like | <i>ash2</i> <sup>1</sup>                        | 16%            |
| <i>trx</i>                | COMPASS-like, TAC1    | <i>trx</i> <sup>E2</sup>                        | -5%            |
| <i>Utx</i>                | COMPASS-like          | <i>Utx</i> <sup>f01321</sup>                    | 16%            |
| <i>nej</i>                | TAC1, ASH1            | <i>nej</i> <sup>EP1179</sup>                    | -29%           |
| <i>ash1</i>               | ASH1                  | <i>ash1</i> <sup>22</sup>                       | 7%             |
| <i>E(bx)</i>              | NURF                  | <i>E(bx)</i> <sup>nurf301-3</sup>               | -17%           |
| <i>Nurf-38</i>            | NURF                  | <i>Nurf-38</i> <sup>k16102</sup>                | -1%            |
| <i>Mi-2</i>               | NURD                  | <i>Mi-2</i> <sup>4</sup>                        | 5%             |
| <i>brm</i>                | SWI/SNF(BAP & PBAP)   | <i>brm</i> <sup>2</sup>                         | -23%           |
|                           |                       | <i>brm</i> <sup>RNAi VDRC37721</sup>            | 18%            |
| <i>osa</i>                | SWI/SNF(BAP)          | <i>osa</i> <sup>308</sup>                       | 28%            |
| <i>Bap170</i>             | SWI/SNF(PBAP)         | <i>Bap170</i> <sup><math>\Delta</math>135</sup> | -19%           |
| <i>Snr1</i>               | SWI/SNF(BAP & PBAP)   | <i>Snr1</i> <sup>E2</sup>                       | 5%             |
|                           |                       | <i>Snr1</i> <sup>SR21</sup>                     | 17%            |
| <i>mor</i>                | SWI/SNF(BAP & PBAP)   | <i>mor</i> <sup>1</sup>                         | 11%            |
|                           |                       | <i>mor</i> <sup>12</sup>                        | 13%            |
|                           |                       | <i>mor</i> <sup>RNAi VDRC6969</sup>             | 42%            |
| <i>Bap55</i>              | SWI/SNF(BAP & PBAP)   | <i>Bap55</i> <sup>LL05955</sup>                 | 23%            |
| <i>Bap60</i>              | SWI/SNF(BAP & PBAP)   | <i>Bap60</i> <sup>RNAi VDRC12673</sup>          | 12%            |
| <i>Bap111</i>             | SWI/SNF(BAP & PBAP)   | <i>Bap111</i> <sup>RNAi VDRC104361</sup>        | -28%           |
| PcG/trxG related proteins |                       |                                                 |                |
| Gene                      | Complex               | Genotype                                        | $\Delta$ Index |
| <i>psq</i>                |                       | <i>psq</i> <sup>E39</sup>                       | 15%            |
| <i>Rbf</i>                |                       | <i>Rbf</i> <sup>f14</sup>                       | 22%            |
| <i>Dsp1</i>               |                       | <i>Dsp1</i> <sup>EP355</sup>                    | 25%            |
| <i>grh</i>                |                       | <i>grh</i> <sup>IM</sup>                        | 6%             |
| <i>lolal</i>              |                       | <i>lolal</i> <sup>K02512</sup>                  | 1%             |
| <i>Pcl</i>                |                       | <i>Pcl</i> <sup>5</sup>                         | 16%            |

|                  |               |                                  |      |
|------------------|---------------|----------------------------------|------|
| <i>HDAC1</i>     |               | <i>HDAC1<sup>def24</sup></i>     | 20%  |
| <i>Sirt1</i>     |               | <i>Sirt1<sup>2A-7-11</sup></i>   | 23%  |
| <i>vtd</i>       | Cohesin       | <i>vtd<sup>4</sup></i>           | 47%  |
| <i>Su(z)2</i>    |               | <i>Su(z)2<sup>1.b7</sup></i>     | -14% |
| <i>gpp</i>       |               | <i>gpp<sup>03342</sup></i>       | -14% |
| <i>mod(mdg4)</i> |               | <i>mod(mdg4)<sup>L3101</sup></i> | 19%  |
| <i>su(Hw)</i>    |               | <i>su(Hw)<sup>e04061</sup></i>   | 25%  |
| <i>lid</i>       |               | <i>lid<sup>10424</sup></i>       | 23%  |
| <i>Asx</i>       |               | <i>Asx<sup>XF23</sup></i>        | 11%  |
| <i>dom</i>       | TIP60 complex | <i>dom<sup>LL05537</sup></i>     | -3%  |
| <i>E(Pc)</i>     |               | <i>E(Pc)<sup>1</sup></i>         | 41%  |
| <i>kis</i>       |               | <i>kis<sup>1</sup></i>           | 0%   |
| <i>kto</i>       | Mediator      | <i>kto<sup>1</sup></i>           | -11% |
| <i>skd</i>       | Mediator      | <i>skd<sup>2</sup></i>           | 21%  |

# Supplemental Figure 1

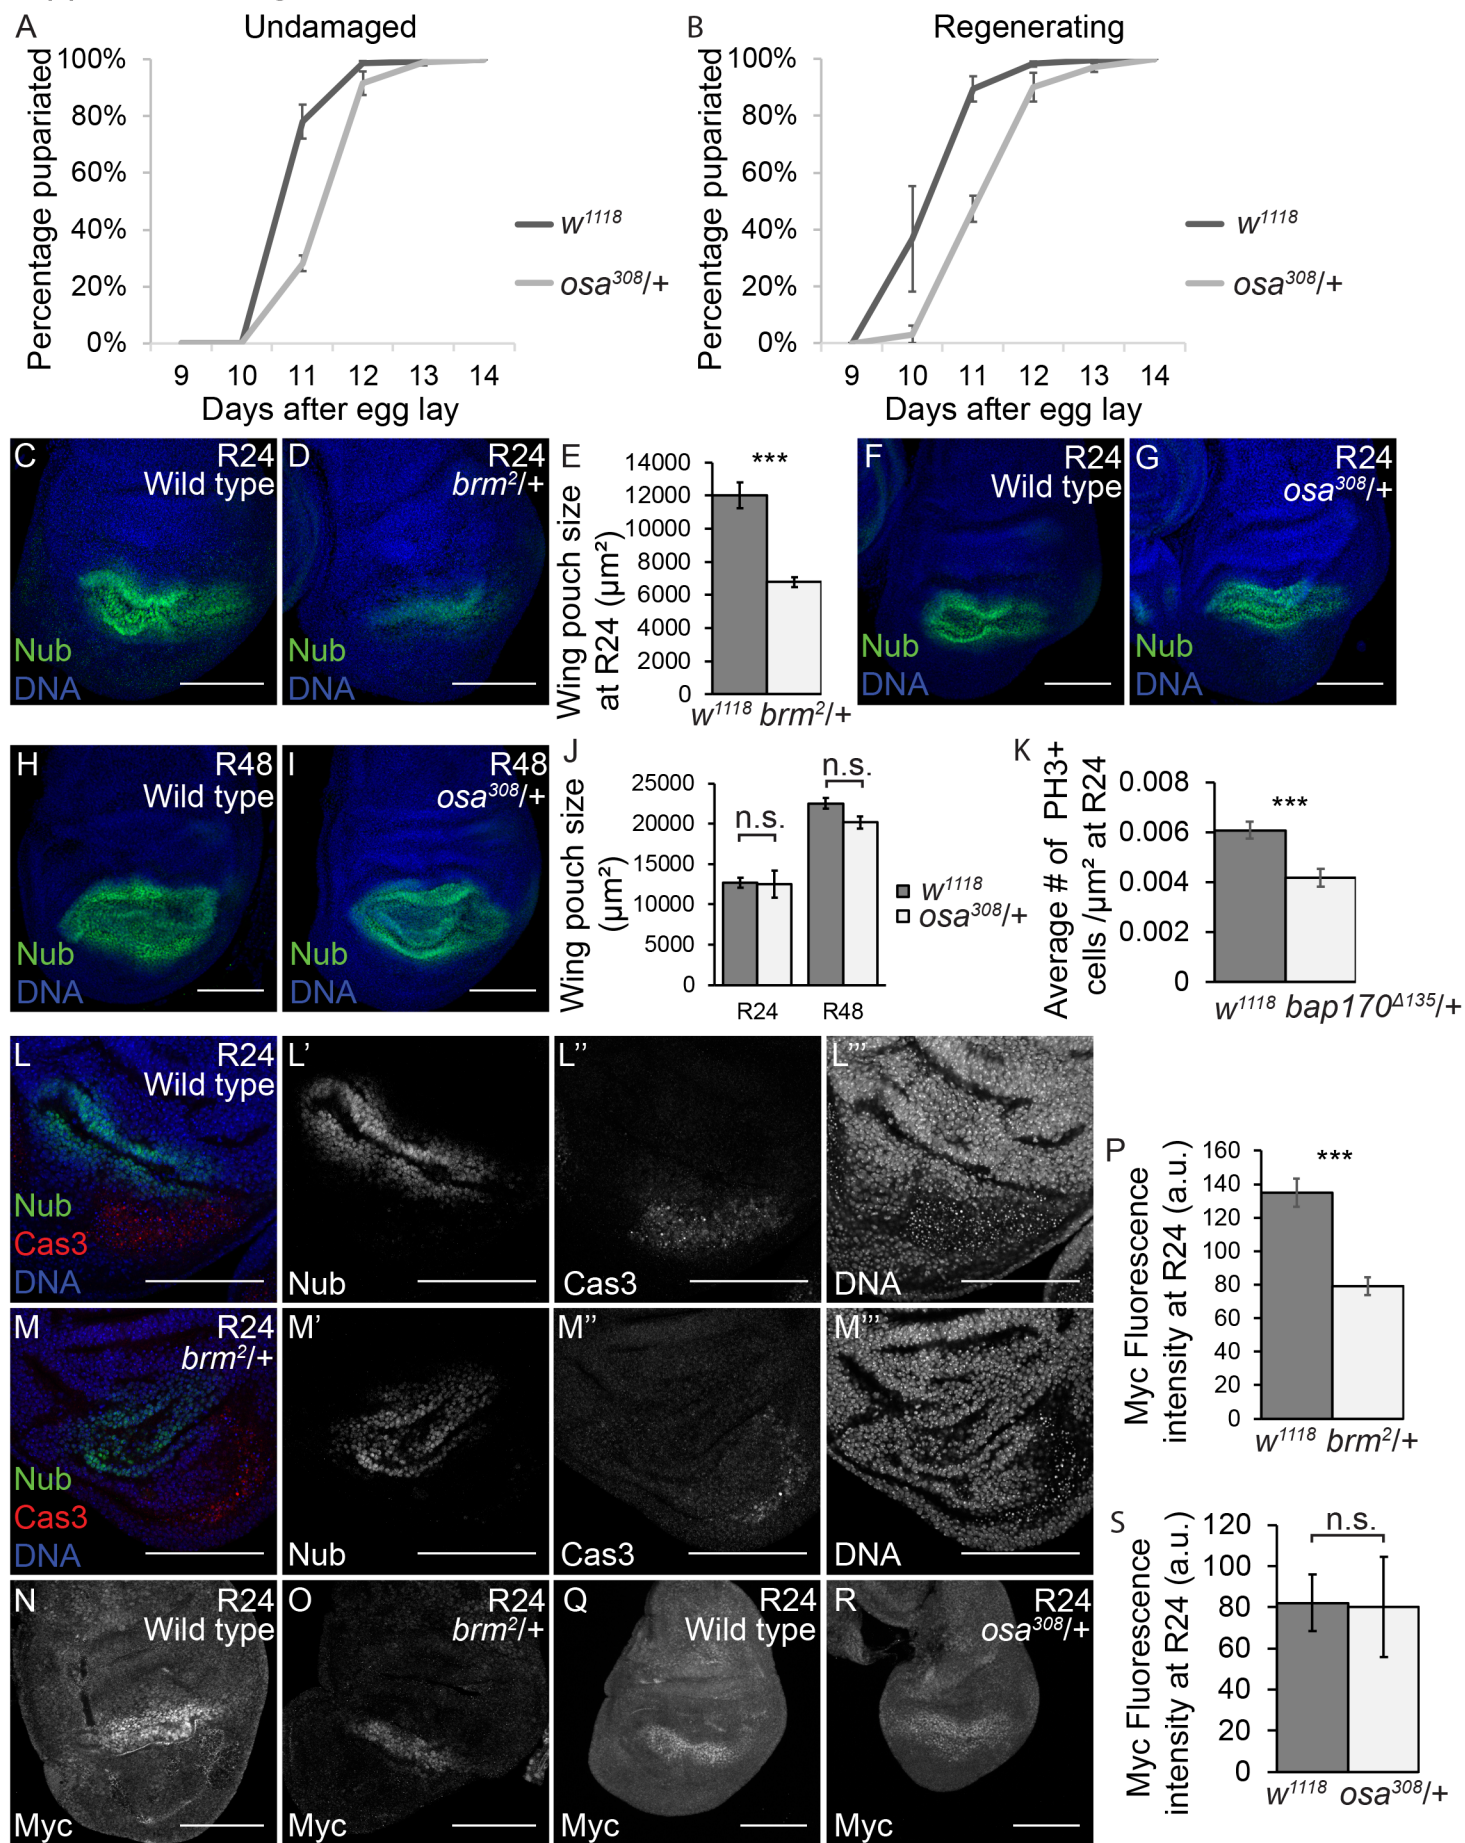

**S1 Fig. The PBAP complex is required for regenerative growth whereas the BAP complex is not.**

(A) Pupariation rates of animals during normal development at 18°C. n = 79 pupae (*osa*<sup>308/+</sup>) and 173 pupae (*w*<sup>1118</sup>) from 3 independent experiments.

(B) Pupariation rates of animals after tissue damage (30°C) and regeneration (18°C). n = 101 pupae (*osa*<sup>308/+</sup>) and 155 pupae (*w*<sup>1118</sup>) from 3 independent experiments. Because the temperature shift to 30°C in the ablation protocol increases the developmental rate, the pupariation timing of regenerating animals (B) cannot be compared to the undamaged control animals (A).

(C) Wild-type (*w*<sup>1118</sup>) regenerating wing disc at R24 with wing pouch marked by anti-Nubbin (green) immunostaining. DNA (blue) was detected with Topro3.

(D) *brm*<sup>2/+</sup> regenerating wing disc at R24 with wing pouch marked by anti-Nubbin (green) immunostaining. DNA (blue) was detected with Topro3.

(E) Comparison of regenerating wing pouch size at 24 hours after imaginal disc damage in *brm*<sup>2/+</sup> and wild-type (*w*<sup>1118</sup>) animals. n = 11 wing discs (*brm*<sup>2/+</sup>) and 10 wing discs (*w*<sup>1118</sup>).

(F) Wild-type (*w*<sup>1118</sup>) regenerating wing disc at R24 with wing pouch marked by anti-Nubbin (green) immunostaining. DNA (blue) was detected with Topro3.

(G) *osa*<sup>308/+</sup> regenerating wing disc at R24 with wing pouch marked by anti-Nubbin (green) immunostaining. DNA (blue) was detected with Topro3.

(H) Wild-type ( $w^{1118}$ ) regenerating wing disc at R48 with wing pouch marked by anti-Nubbin (green) immunostaining. DNA (blue) was detected with Topro3.

(I)  $osa^{308/+}$  regenerating wing disc at R48 with wing pouch marked by anti-Nubbin (green) immunostaining. DNA (blue) was detected with Topro3.

(J) Comparison of regenerating wing pouch size at 24 and 48 hours after imaginal disc damage and regeneration in  $osa^{308/+}$  and wild-type ( $w^{1118}$ ) animals. At R24,  $n = 8$  wing discs ( $osa^{308/+}$ ) and 10 wing discs ( $w^{1118}$ ). At R48,  $n = 6$  wing discs ( $osa^{308/+}$ ) and 8 wing discs ( $w^{1118}$ ).

(K) Average number of mitotic cells (marked with PH3 immunostaining) per  $\mu\text{m}^2$  in the regenerating wing primordium at R24 in  $bap170^{\Delta 135/+}$  and wild-type ( $w^{1118}$ ) animals.  $n = 8$  wing discs ( $bap170^{\Delta 135/+}$ ) and 10 wing discs ( $w^{1118}$ ).

(L) Wild-type ( $w^{1118}$ ) regenerating wing disc at R24 with Nubbin (green) (L') and cleaved Caspase 3 (red)(L'') immunostaining. DNA (blue)(L''') was detected with Topro3.

(M)  $brm^2/+$  regenerating wing disc at R24 with Nubbin (green)(M') and cleaved Caspase 3 (red)(M'') immunostaining. DNA (blue)(M''') was detected with Topro3.

(N-O) Wild-type ( $w^{1118}$ ) (N) and  $brm^2/+$  (O) regenerating wing discs at R24 with Myc immunostaining.

(P) Quantification of anti-Myc immunostaining fluorescence intensity in the wing pouch in  $brm^2/+$  and wild-type ( $w^{1118}$ ) regenerating wing discs at R24.  $n = 11$  wing

discs (*brm*<sup>2/+</sup>) and 12 wing discs (*w*<sup>1118</sup>).

(Q-R) Wild-type (*w*<sup>1118</sup>) (Q) and *osa*<sup>308/+</sup> (R) regenerating wing discs at R24 with Myc immunostaining.

(S) Quantification of anti-Myc immunostaining fluorescence intensity in the wing pouch in *osa*<sup>308/+</sup> and wild-type (*w*<sup>1118</sup>) regenerating wing discs at R24. n = 6 wing discs (*osa*<sup>308/+</sup>) and 8 wing discs (*w*<sup>1118</sup>).

Error bars are SEM. Scale bars are 100µm for all wing discs images. \*\*\* p < 0.01, Student's *t*-test.

Supplemental Figure 2

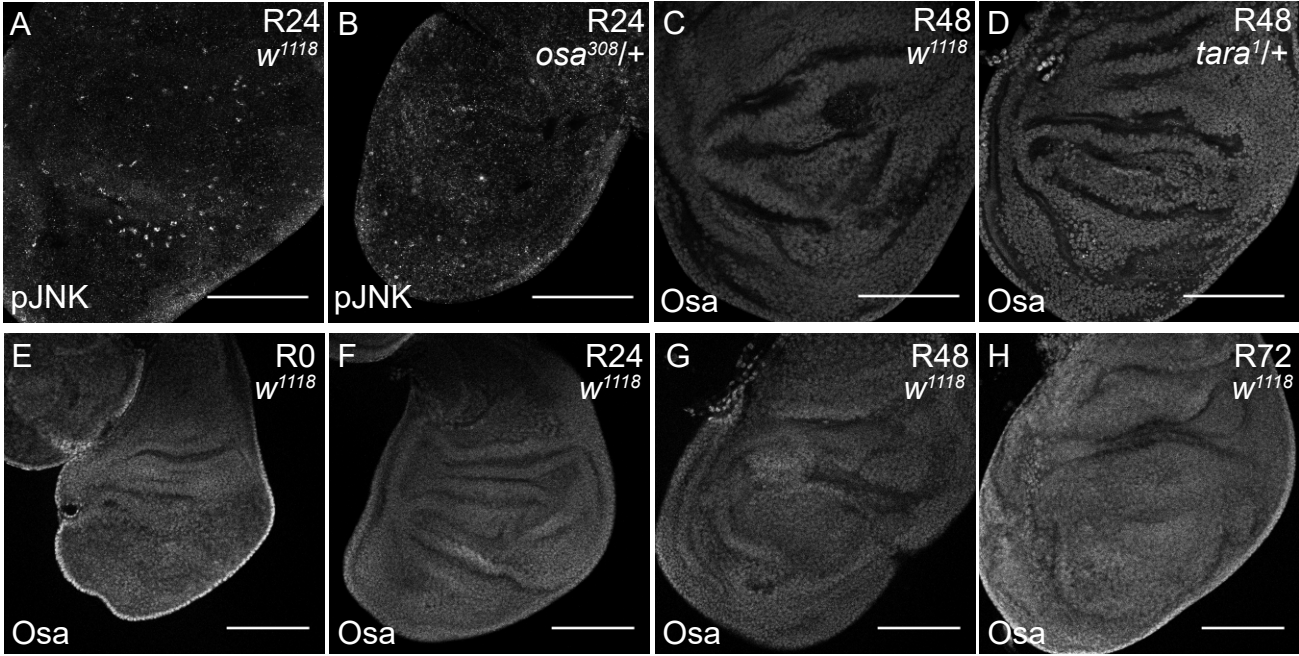

**S2 Fig. The function of BAP in preventing P-to-A transformation.**

(A-B) Wild-type (*w<sup>1118</sup>*) (A) and *osa<sup>308/+</sup>* (B) regenerating wing discs at R24 with phospho-JNK immunostaining.

(C-D) Wild-type (*w<sup>1118</sup>*) (C) and *tara<sup>1/+</sup>* (D) regenerating wing discs at R48 with Osa immunostaining.

(E-H) Wild-type (*w<sup>1118</sup>*) regenerating wing discs at 0, 24, 48, and 72 hours after imaginal disc damage and regeneration with Osa immunostaining.

Scale bars are 100µm for all wing discs images.
